# Supplementary figures and images for: Characterization of Equilibrium Catalysts from the Fluid Catalytic Cracking Process of Atmospheric Residue
Source: Preprints.org preprint supplement (doi:10.20944/preprints202310.1340.v1), 2023-10-23

● Si  
● Al  
● O  
● H

Hydrogen Bond  
○ — ○

Dickite •  $\text{Al}_2\text{Si}_2\text{O}_5(\text{OH})_4$

— a — b — c

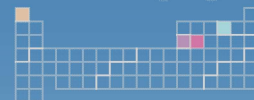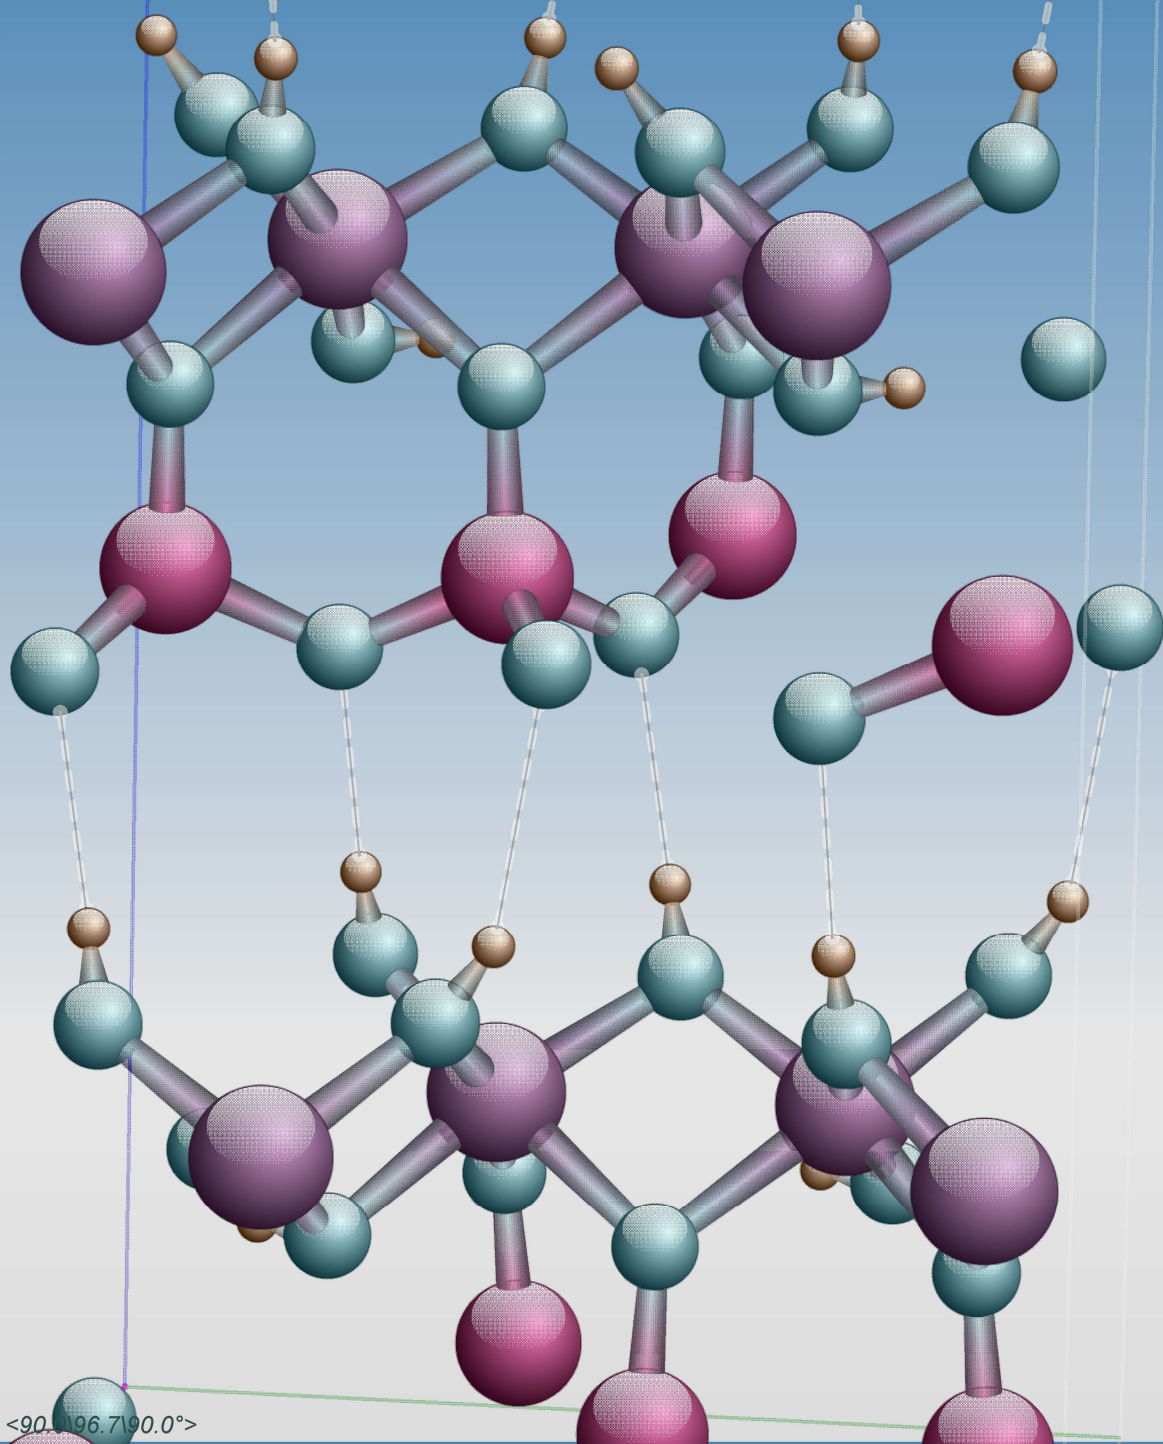

Monoclinic • Cc (9): 5.138\8.918\14.389Å <90.196 790.0°>

Supplement: Supplementary file 1 [file a.pdf › ICDD phases interlinkage Images/fresh catalyst images/a.pdf]

● Si  
● Al  
● Fe  
● Zn  
● Mg  
● O

Staurolite •  $\text{Zn}_{0.04}\text{Fe}_{3.4}\text{Si}_{7.6}\text{Al}_{19.72}\text{Mg}_{0.8}\text{O}_{48}$

-a- -b- -c-

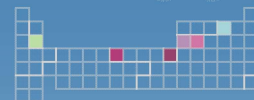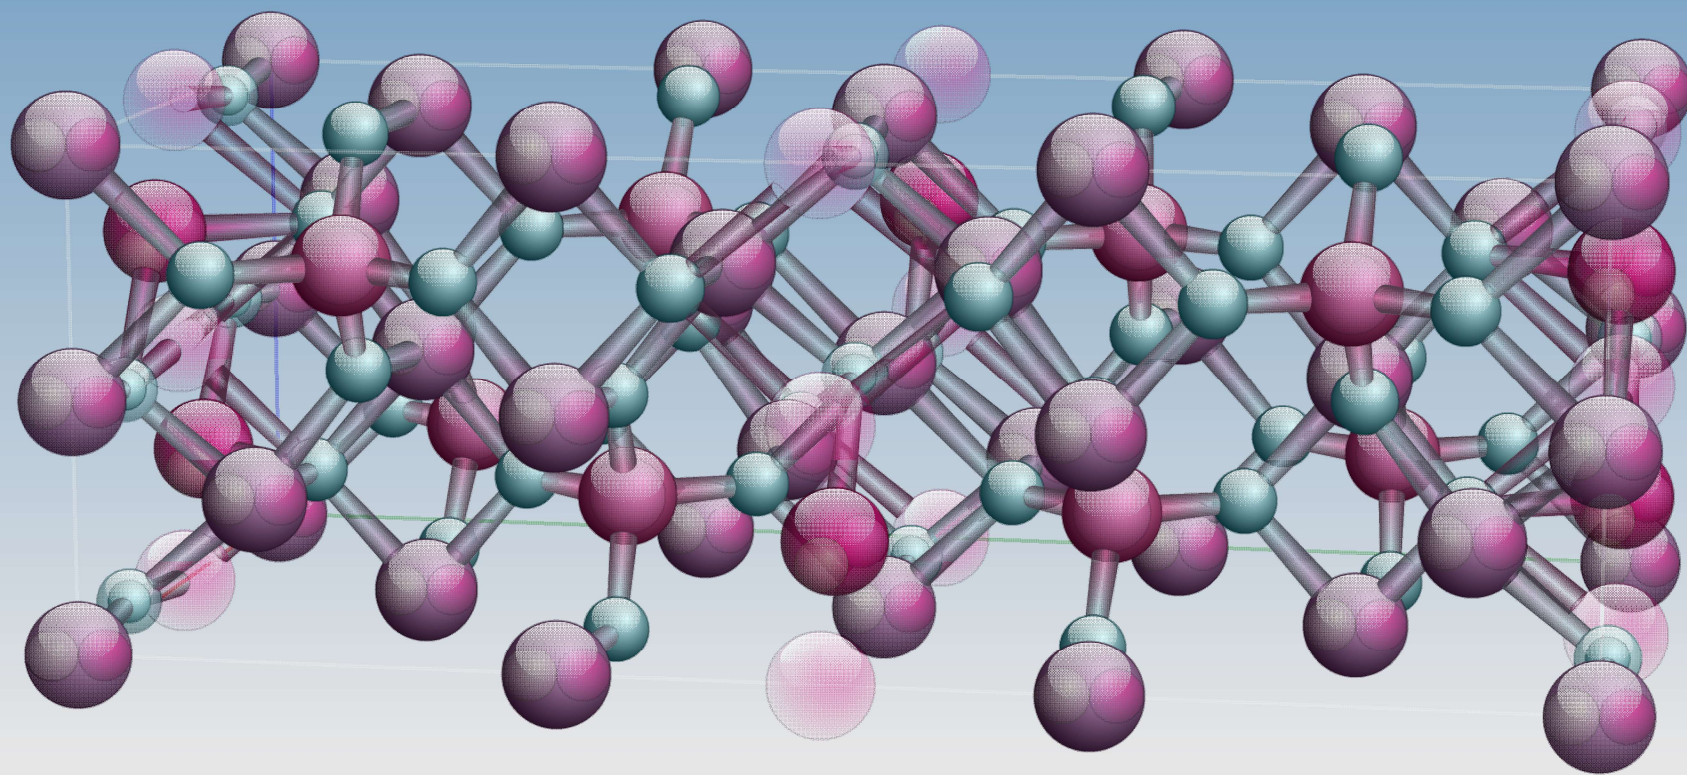

Monoclinic •  $C2/m$  (12): 7.864\16.619\5.659Å <90.0\90.2\90.0°>

Supplement: Supplementary file 2 [file okkk.pdf › ICDD phases interlinkage Images/fresh catalyst images/okkk.pdf]

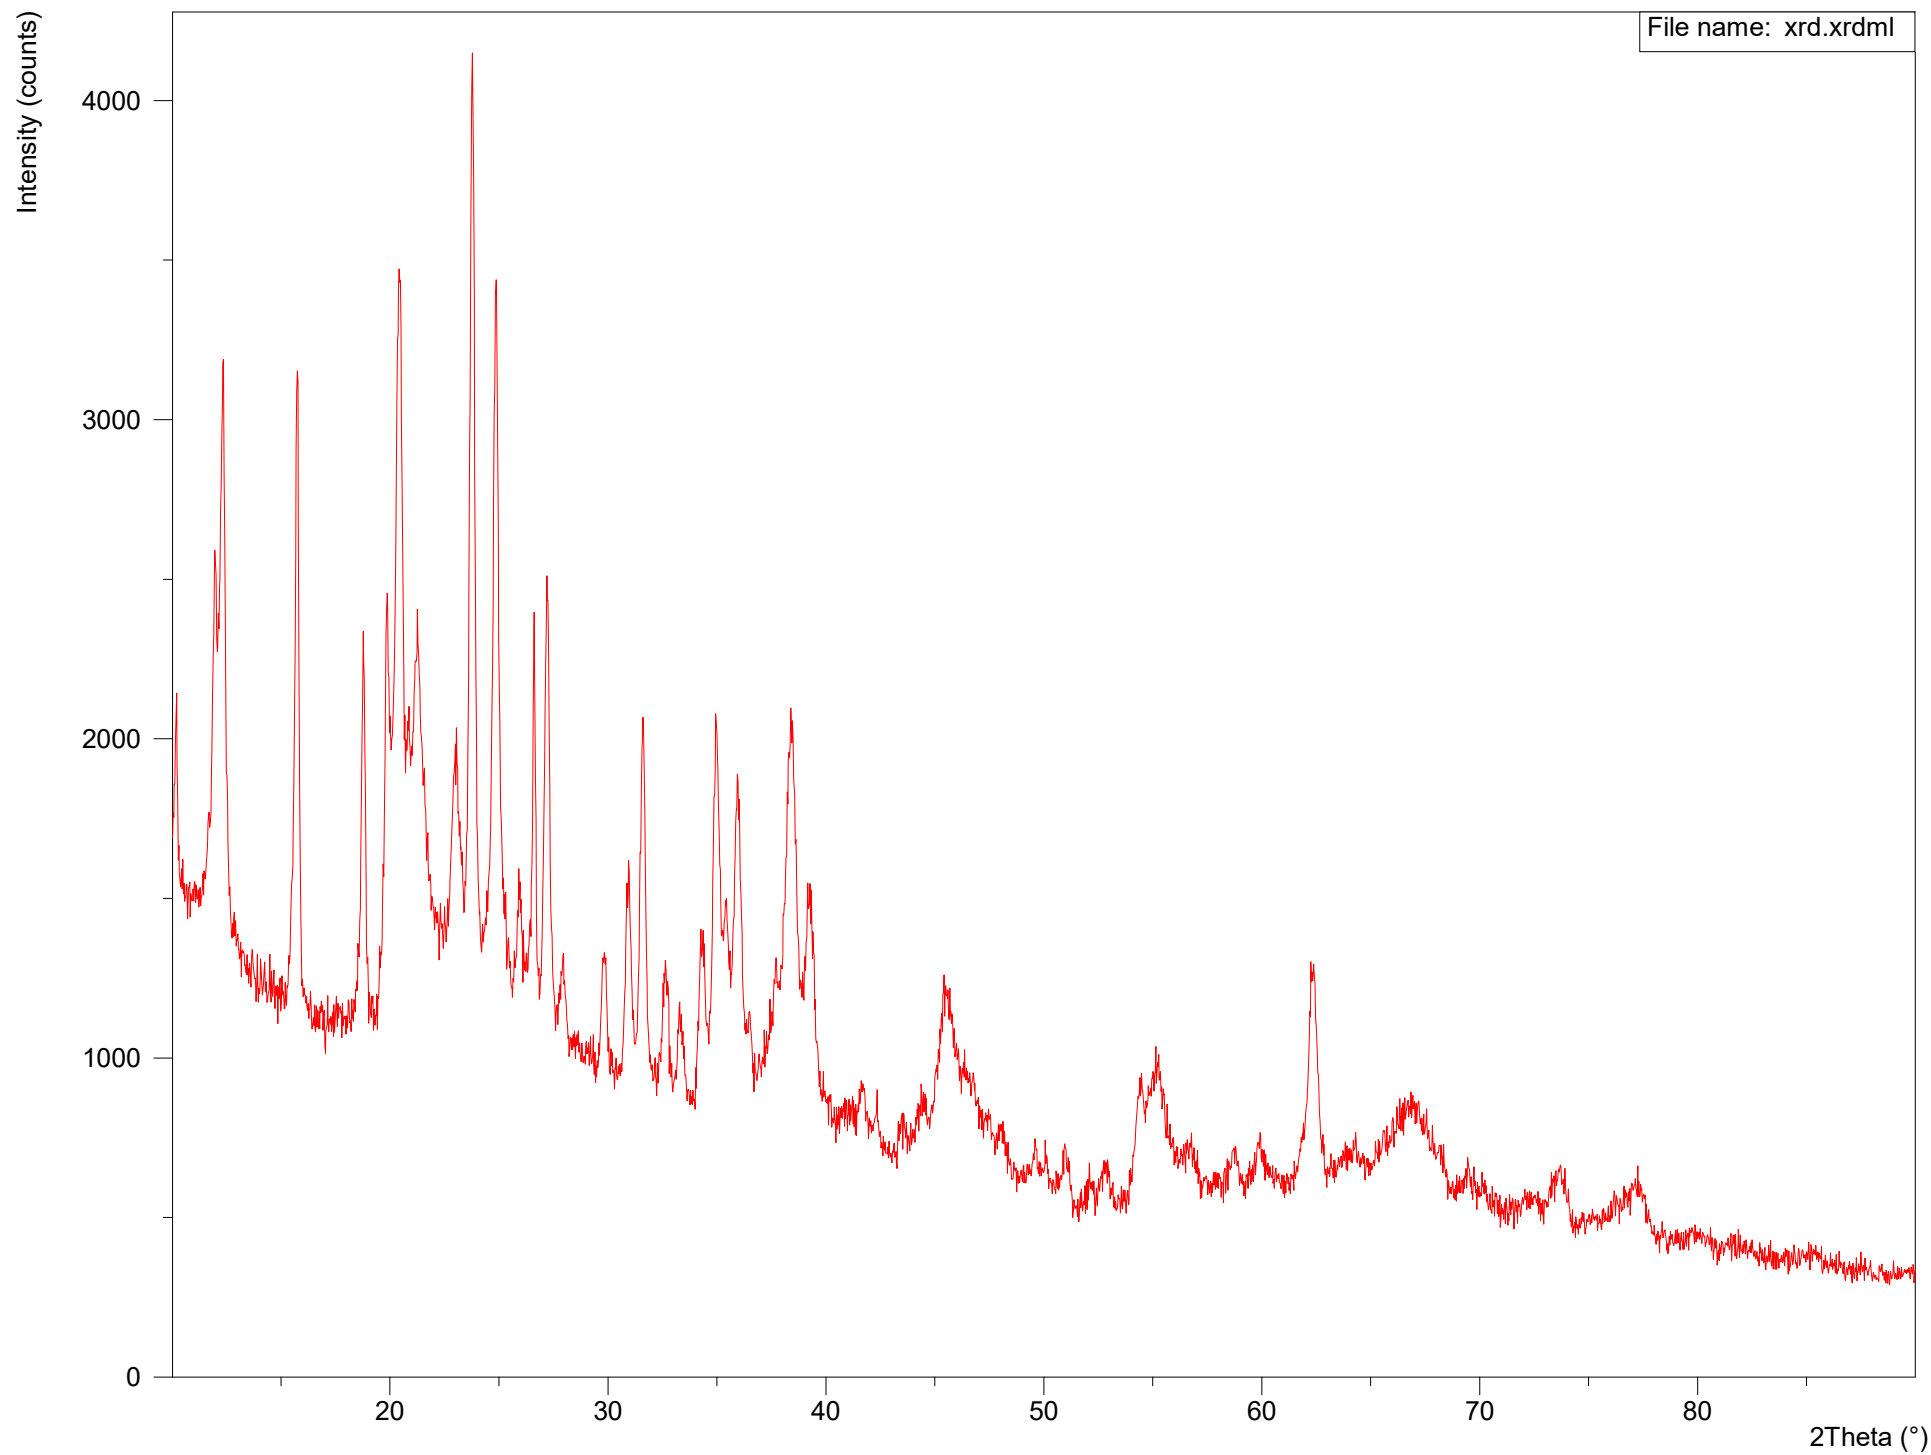

Supplement: Supplementary file 3 [file xrd.pdf › sources data/xrd fresh catalyst/xrd.pdf]

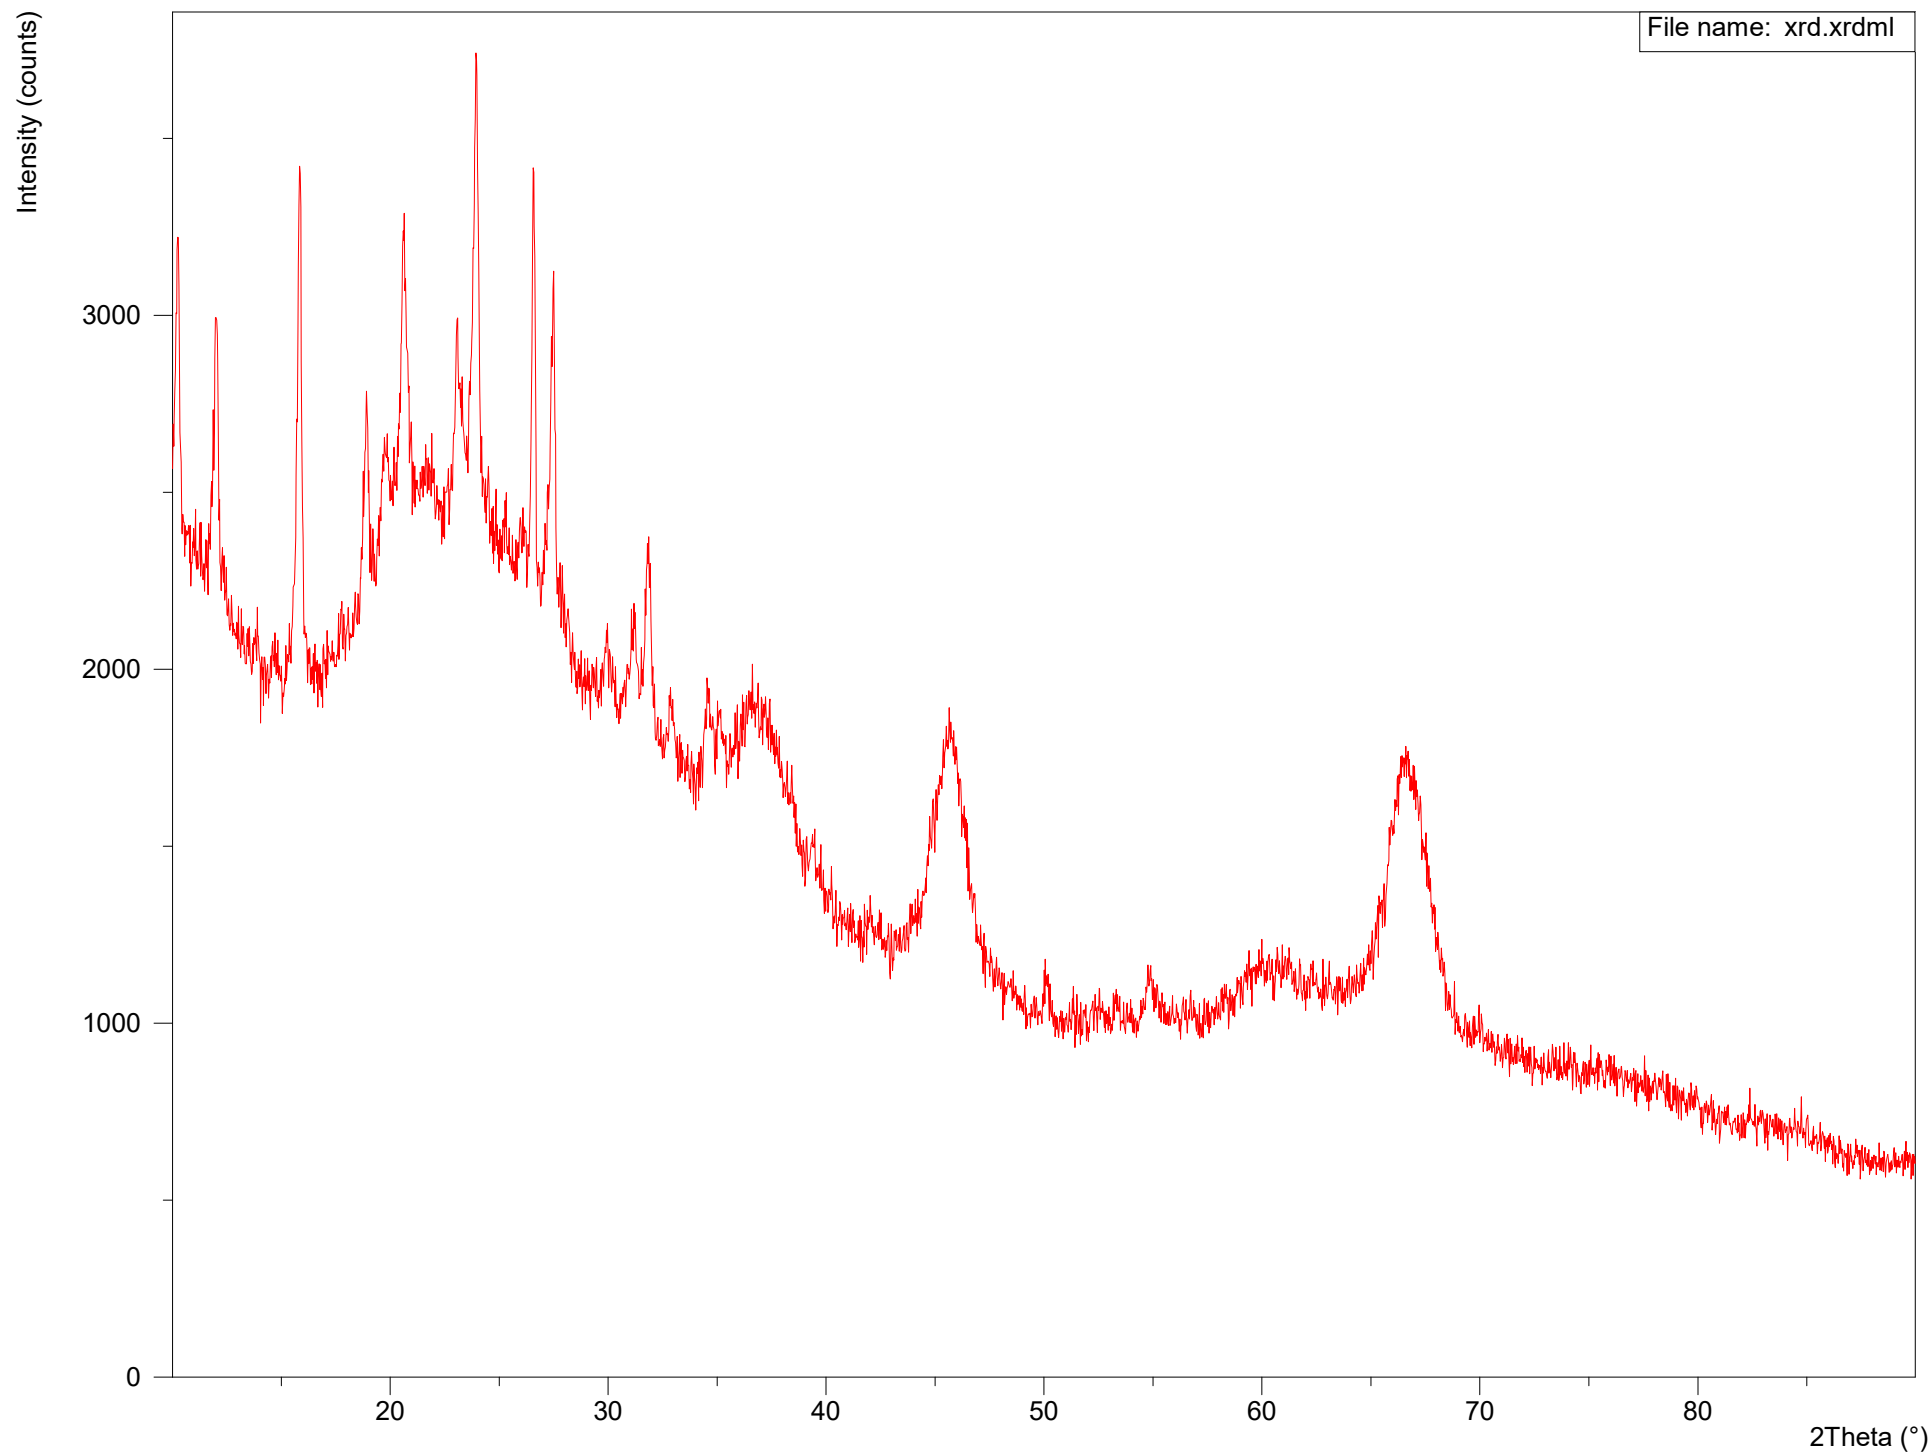

Supplement: Supplementary file 4 [file xrd.pdf › sources data/xrd regenerated catalyst/xrd.pdf]

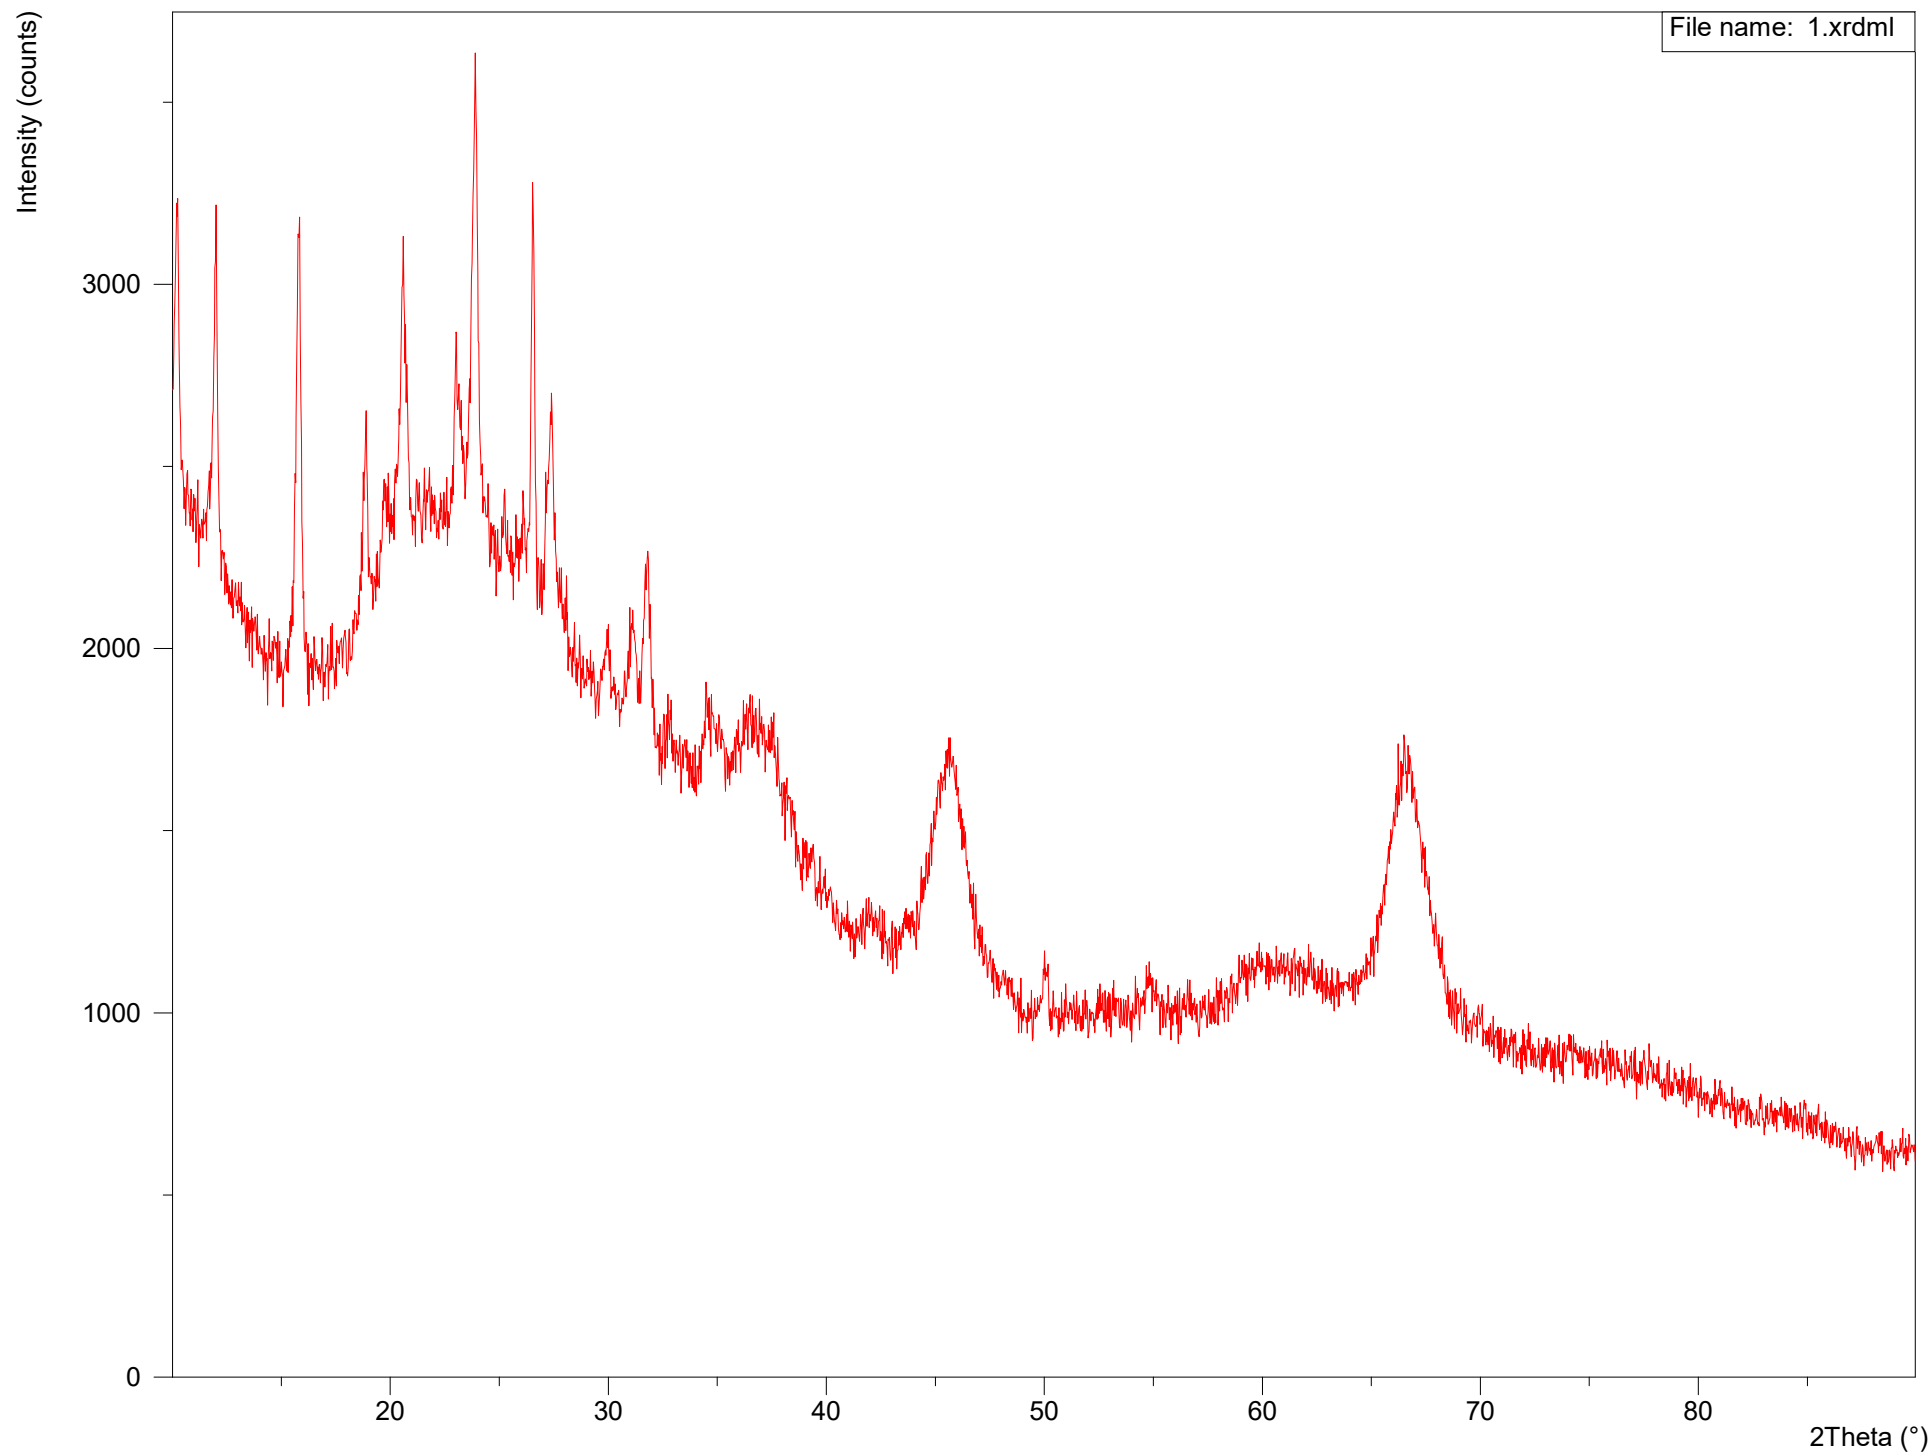

Supplement: Supplementary file 5 [file 1.pdf › sources data/xrd spent catalyst/1.pdf]
